# Supplementary material for: Metamagnetism and canted antiferromagnetic ordering in two monomeric Co II complexes with 1-(2-pyrimidyl)piperazine. Hirshfeld surface analysis and theoretical studies
Source: Royal Society of Chemistry journal article supplement (doi:10.1039/d4ra00716f), 2024-01-01
Supplement: d4ra00716f1.pdf [file d4ra00716f1.pdf]

**Metamagnetism and canted antiferromagnetic ordering in two monomeric Co<sup>II</sup> complexes with 1-(2pyrimidyl)piperazine.  
Hirshfeld surface analysis and theoretical studies**

**Anissa Hannachi<sup>a,\*</sup>, Youness El Bakri<sup>b,\*</sup>, Kandasamy Saravanan<sup>c</sup>, Carlos J. Gómez-García<sup>d</sup>, Hatem A. Abuelizz<sup>e</sup>, Rashad Al-Salahi<sup>e</sup>, Wajda Smirani<sup>a</sup>**

*<sup>a</sup> Laboratory of Material Chemistry, Faculty of Sciences of Bizerte, University of Carthage, Bizerte, 7021 Zarzouna, Tunisia.*

*<sup>b</sup> Department of Theoretical and Applied Chemistry, South Ural State University, Lenin prospect 76, Chelyabinsk, 454080, Russian Federation.*

*<sup>c</sup> Faculty of Chemistry, University of Warsaw, Poland.*

*<sup>d</sup> Departamento de Química Inorgánica. Universidad de Valencia. C/ Dr. Moliner 50. 46100 Burjasot (Valencia). Spain.*

*<sup>e</sup> Department of Pharmaceutical Chemistry, College of Pharmacy, King Saud University, Riyadh 11451, Saudi Arabia.*

Corresponding author: [hannachianissa@gmail.com](mailto:hannachianissa@gmail.com) / [yus.elbakri@gmail.com](mailto:yus.elbakri@gmail.com)

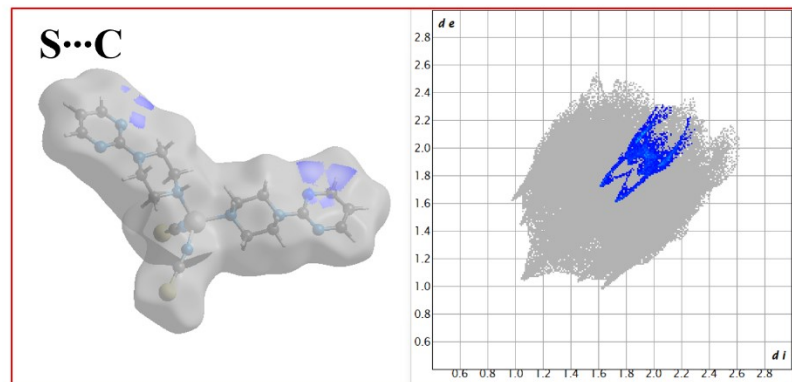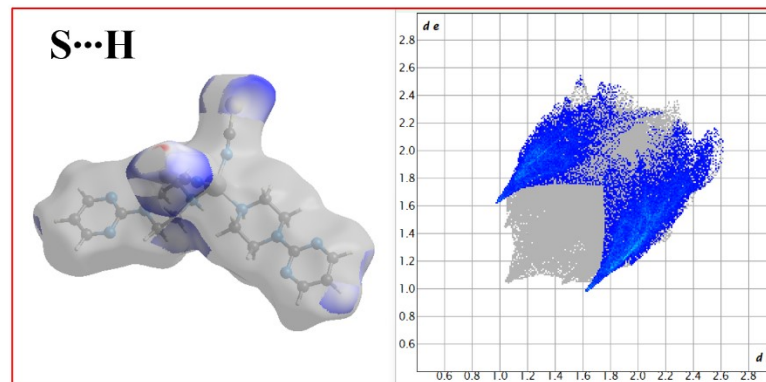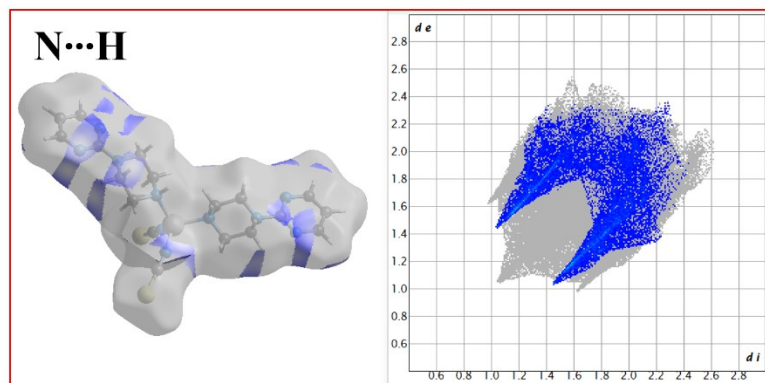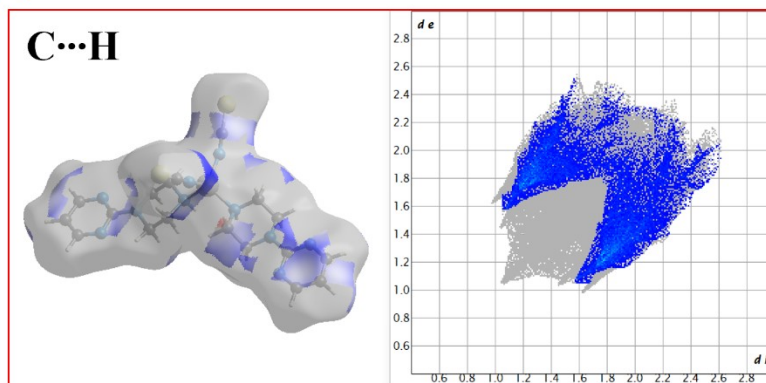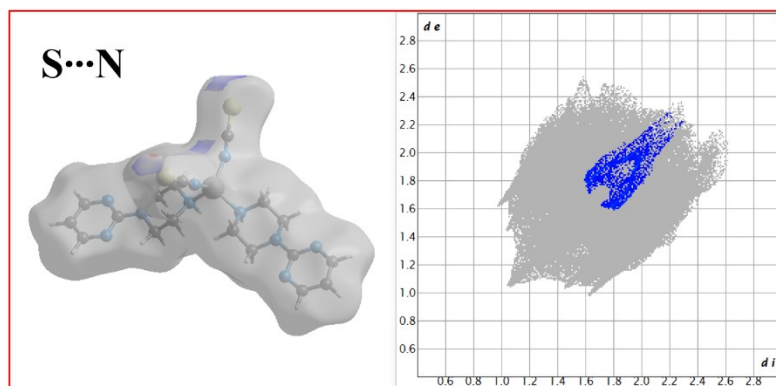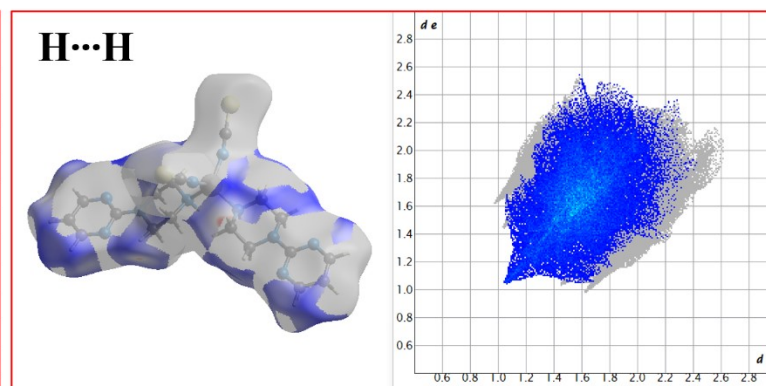

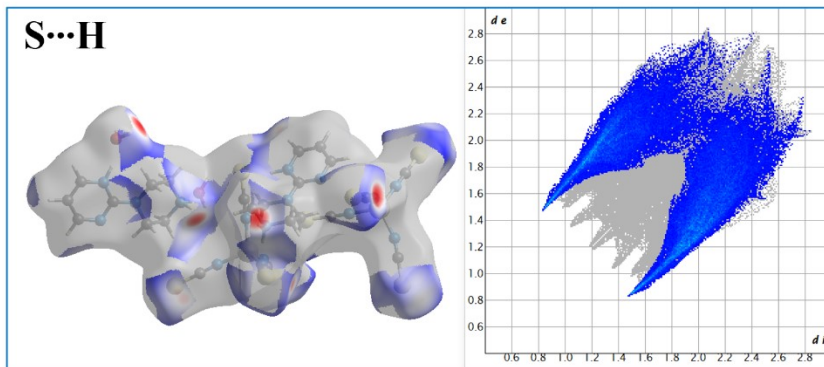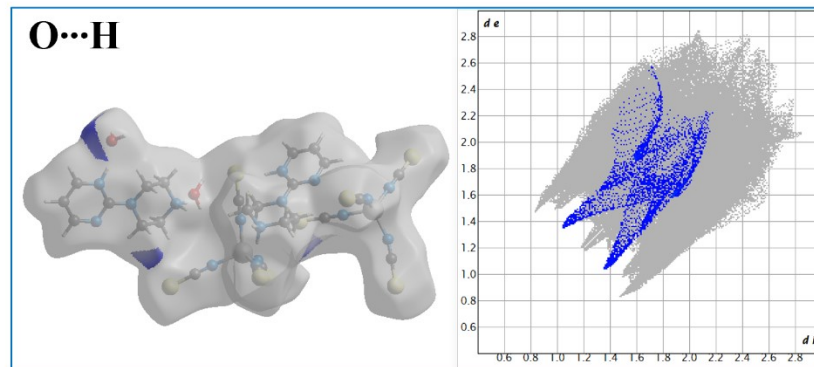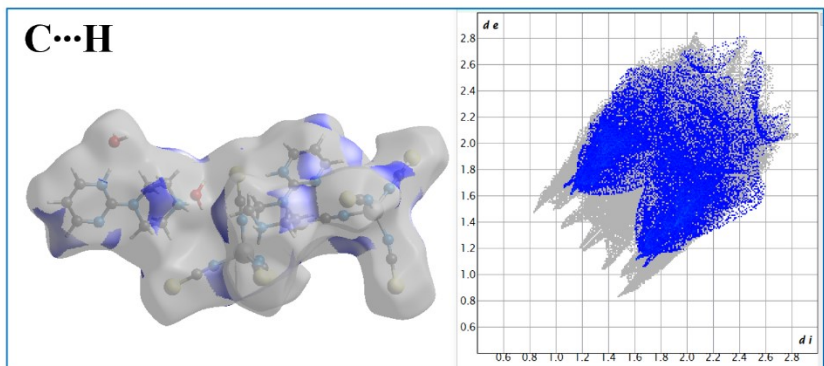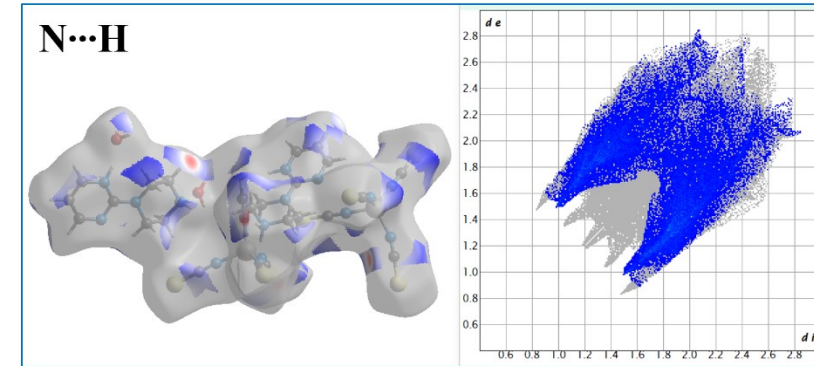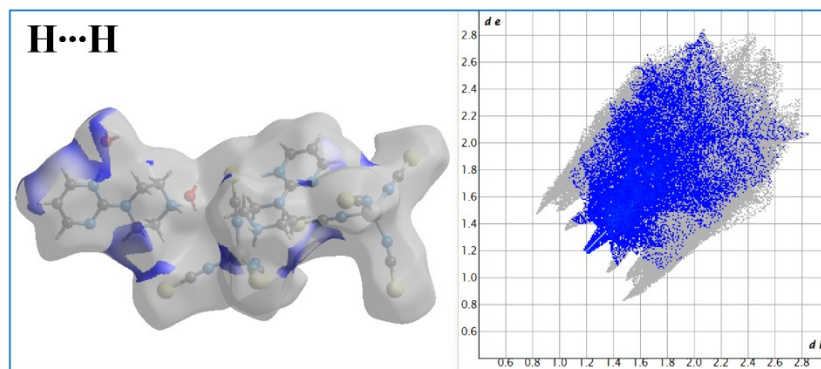

**Figure S1:** The decomposed  $d_{\text{norm}}$  maps and their fingerprint plots of both complexes.

**Compound 1:**

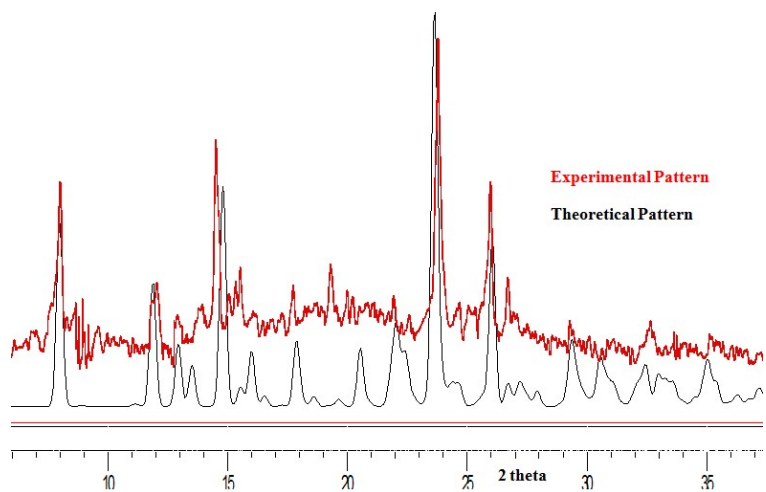

**Compound 2:**

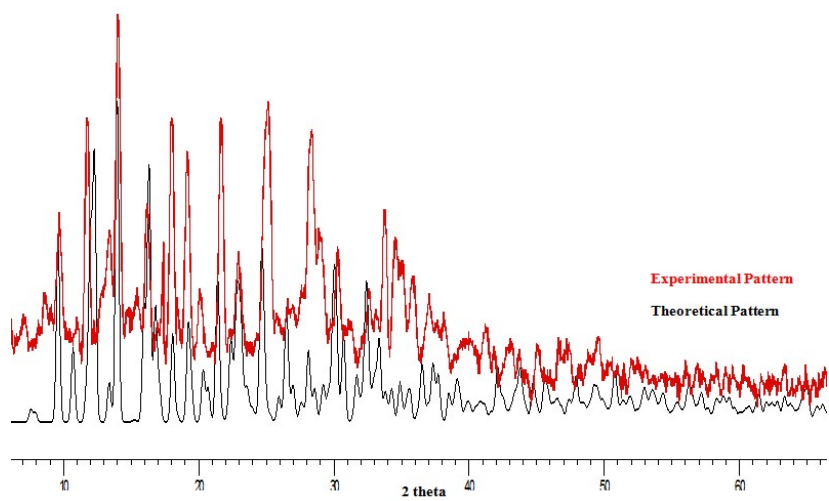

**Fig S2.** The XRPD of the two compounds

**Table S1:** The enrichment contacts ratio of both complexes

| <b>Complex-I</b>  |             |             |             |             |             |             |      |
|-------------------|-------------|-------------|-------------|-------------|-------------|-------------|------|
| E                 | H           | C           | N           | S           | Co          | HC          |      |
| H                 | 0           |             |             |             |             |             |      |
| C                 | 0.02        | 0.78        |             |             |             |             |      |
| N                 | 0           | <b>1.52</b> | 0.37        |             |             |             |      |
| S                 | <b>5.74</b> | 0.67        | 0.39        | 0.31        |             |             |      |
| Co                | 0           | 0.35        | 0           | <b>3.58</b> | 0           |             |      |
| HC                | 0.18        | <b>1.21</b> | <b>1.2</b>  | <b>1.04</b> | 0.74        | 0.93        |      |
| <b>Complex-II</b> |             |             |             |             |             |             |      |
| E                 | H           | C           | N           | O           | S           | Co          | HC   |
|                   |             |             |             |             |             |             |      |
| H                 | 0           |             |             |             |             |             |      |
| C                 | 0.61        | <b>1.23</b> |             |             |             |             |      |
| N                 | 0.29        | 0.87        | 0.66        |             |             |             |      |
| O                 | 0           | 0.52        | 0.04        | 0           |             |             |      |
| S                 | <b>2.22</b> | 0.89        | <b>1.34</b> | 0.06        | 0.39        |             |      |
| Co                | 0.3         | 0.98        | 0.14        | 0           | <b>1.48</b> |             | 0    |
| HC                | 0.39        | <b>1.16</b> | <b>1.24</b> | <b>3.56</b> | <b>1.33</b> | <b>1.12</b> | 0.42 |

**Table S2:** Topological properties of metal complex 1

| Atom1 | Atom2 | Gcp<br>kJ/mol/Bohr <sup>3</sup> | Vcp<br>kJ/mol/Bohr <sup>3</sup> | DIST12 | $\rho_{(r)}$ | $\nabla^2\rho_{(r)}$ | $\lambda_1$ | $\lambda_2$ | $\lambda_3$ | $\varepsilon$ |
|-------|-------|---------------------------------|---------------------------------|--------|--------------|----------------------|-------------|-------------|-------------|---------------|
| Co1   | N1    | 233.89                          | -260.11                         | 2.0374 | 0.49053      | 7.625                | -2.072      | -2.06       | 11.757      | 0.0057        |
| Co1   | N13   | 295.53                          | -335.14                         | 1.9546 | 0.5765       | 9.396                | -2.71       | -2.71       | 14.816      | 0             |
| Co1   | N15   | 308.05                          | -350.76                         | 1.9419 | 0.59362      | 9.742                | -2.826      | -2.826      | 15.393      | 0.0001        |
| Co1   | N1A   | 230.39                          | -255.86                         | 2.0417 | 0.48537      | 7.524                | -2.037      | -2.035      | 11.596      | 0.0012        |
| S1    | C14   | 449.15                          | -941.99                         | 1.6247 | 1.29014      | -1.604               | -4.979      | -4.979      | 8.354       | 0             |
| S2    | C16   | 447.19                          | -935.96                         | 1.6275 | 1.28468      | -1.526               | -4.959      | -4.959      | 8.391       | 0             |
| N1    | H1    | 562.04                          | -1780.76                        | 0.8893 | 2.00809      | -24.11               | -27.781     | -27.736     | 31.406      | 0.0016        |
| N1    | C2    | 620.01                          | -1159.78                        | 1.4777 | 1.42809      | 2.947                | -7.01       | -6.976      | 16.932      | 0.0048        |
| N1    | C6    | 611.76                          | -1138.65                        | 1.484  | 1.41088      | 3.116                | -6.931      | -6.874      | 16.921      | 0.0084        |
| N4    | C3    | 635.25                          | -1204.28                        | 1.4598 | 1.46496      | 2.432                | -7.274      | -7.27       | 16.975      | 0.0006        |
| N4    | C5    | 636.85                          | -1208.37                        | 1.4588 | 1.46822      | 2.399                | -7.334      | -7.235      | 16.967      | 0.0137        |
| N4    | C7    | 712.6                           | -1455.77                        | 1.3812 | 1.6668       | -1.122               | -8.553      | -8.352      | 15.783      | 0.024         |
| N8    | C7    | 755.05                          | -1605.86                        | 1.3413 | 1.78141      | -3.515               | -9.16       | -8.865      | 14.51       | 0.0333        |
| N8    | C9    | 773.51                          | -1651.67                        | 1.3339 | 1.81305      | -3.842               | -9.246      | -9.053      | 14.457      | 0.0213        |
| N12   | C7    | 745.69                          | -1572.3                         | 1.3499 | 1.75616      | -2.971               | -9.008      | -8.784      | 14.822      | 0.0255        |
| N12   | C11   | 764.88                          | -1623.18                        | 1.3406 | 1.79219      | -3.43                | -9.156      | -8.97       | 14.695      | 0.0207        |
| N13   | C14   | 1419.45                         | -2601.33                        | 1.1642 | 2.30819      | 8.723                | -12.764     | -12.763     | 34.25       | 0             |
| N15   | C16   | 1466.06                         | -2654.35                        | 1.158  | 2.32988      | 10.199               | -13.033     | -13.033     | 36.265      | 0.0001        |
| N1A   | H1A   | 560.96                          | -1698.63                        | 0.9058 | 1.94181      | -21.174              | -25.899     | -25.849     | 30.575      | 0.0019        |
| N1A   | C2A   | 605.7                           | -1122.57                        | 1.4893 | 1.39757      | 3.261                | -6.85       | -6.794      | 16.906      | 0.0082        |
| N1A   | C6A   | 626.5                           | -1177.69                        | 1.4715 | 1.44283      | 2.765                | -7.113      | -7.066      | 16.943      | 0.0066        |
| N4A   | C3A   | 647.68                          | -1237.45                        | 1.4504 | 1.49152      | 2.126                | -7.411      | -7.411      | 16.948      | 0             |
| N4A   | C5A   | 632.76                          | -1197                           | 1.4623 | 1.45898      | 2.515                | -7.252      | -7.213      | 16.98       | 0.0054        |
| N4A   | C7A   | 727.57                          | -1506.14                        | 1.3677 | 1.70551      | -1.872               | -8.798      | -8.508      | 15.434      | 0.034         |
| N8A   | C7A   | 744.86                          | -1568.11                        | 1.3513 | 1.75284      | -2.878               | -8.986      | -8.769      | 14.876      | 0.0248        |

|      |      |        |          |        |         |         |         |         |        |        |
|------|------|--------|----------|--------|---------|---------|---------|---------|--------|--------|
| N8A  | C9A  | 784.39 | -1688.56 | 1.3249 | 1.83997 | -4.398  | -9.408  | -9.114  | 14.124 | 0.0323 |
| N12A | C7A  | 754.03 | -1600.93 | 1.3427 | 1.77756 | -3.41   | -9.074  | -8.913  | 14.577 | 0.0181 |
| N12A | C11A | 776.22 | -1661.31 | 1.3314 | 1.82017 | -3.997  | -9.327  | -9.033  | 14.363 | 0.0326 |
| C2   | H2A  | 435.25 | -1107.71 | 0.9895 | 1.46836 | -8.709  | -12.027 | -12.018 | 15.336 | 0.0007 |
| C2   | H2B  | 435.13 | -1107.37 | 0.9896 | 1.46809 | -8.705  | -12.027 | -12.015 | 15.336 | 0.001  |
| C2   | C3   | 470.5  | -913.05  | 1.5091 | 1.24691 | 1.026   | -5.494  | -5.491  | 12.011 | 0.0005 |
| C3   | H3A  | 433.69 | -1103.2  | 0.9905 | 1.46467 | -8.658  | -11.998 | -11.995 | 15.335 | 0.0003 |
| C3   | H3B  | 434.06 | -1104.14 | 0.9902 | 1.46542 | -8.666  | -12.003 | -11.996 | 15.334 | 0.0006 |
| C5   | H5A  | 433.72 | -1102.69 | 0.9907 | 1.46414 | -8.637  | -11.99  | -11.976 | 15.329 | 0.0012 |
| C5   | H5B  | 433.97 | -1104.87 | 0.9898 | 1.46618 | -8.699  | -12.022 | -12.012 | 15.336 | 0.0009 |
| C5   | C6   | 464.63 | -897.94  | 1.5153 | 1.23342 | 1.15    | -5.427  | -5.42   | 11.996 | 0.0013 |
| C6   | H6A  | 435    | -1106.41 | 0.99   | 1.4672  | -8.68   | -12.005 | -12.003 | 15.328 | 0.0001 |
| C6   | H6B  | 435.3  | -1107.84 | 0.9894 | 1.46846 | -8.71   | -12.02  | -12.02  | 15.33  | 0      |
| C9   | H9   | 455.46 | -1213.99 | 0.9497 | 1.56159 | -11.127 | -13.317 | -13.141 | 15.331 | 0.0133 |
| C9   | C10  | 591.95 | -1271.1  | 1.3721 | 1.551   | -3.202  | -7.337  | -7.114  | 11.249 | 0.0312 |
| C10  | H10  | 455.78 | -1214.55 | 0.9501 | 1.56197 | -11.124 | -13.236 | -13.229 | 15.341 | 0.0006 |
| C10  | C11  | 588.34 | -1260.32 | 1.3754 | 1.54241 | -3.07   | -7.318  | -7.044  | 11.292 | 0.0389 |
| C11  | H11  | 454.77 | -1211.81 | 0.9501 | 1.55985 | -11.097 | -13.23  | -13.19  | 15.323 | 0.0031 |
| C2A  | H2A1 | 435.07 | -1106.39 | 0.9901 | 1.46714 | -8.674  | -12.006 | -11.997 | 15.329 | 0.0008 |
| C2A  | H2A2 | 435.11 | -1106.54 | 0.9901 | 1.46727 | -8.676  | -12.01  | -11.997 | 15.33  | 0.0011 |
| C2A  | C3A  | 473.52 | -920.89  | 1.5059 | 1.25388 | 0.96    | -5.533  | -5.524  | 12.016 | 0.0015 |
| C3A  | H3A1 | 433.81 | -1103.24 | 0.9906 | 1.46464 | -8.651  | -11.998 | -11.993 | 15.341 | 0.0004 |
| C3A  | H3A2 | 435.12 | -1107.58 | 0.9893 | 1.46829 | -8.714  | -12.033 | -12.023 | 15.342 | 0.0008 |
| C5A  | H5A1 | 434.06 | -1104.55 | 0.99   | 1.46582 | -8.681  | -12.011 | -12.003 | 15.333 | 0.0006 |
| C5A  | H5A2 | 433.87 | -1104.55 | 0.9898 | 1.46592 | -8.695  | -12.019 | -12.011 | 15.336 | 0.0007 |
| C5A  | C6A  | 471.84 | -916.47  | 1.5078 | 1.24994 | 0.999   | -5.51   | -5.504  | 12.013 | 0.001  |
| C6A  | H6A1 | 434.64 | -1104.78 | 0.9906 | 1.46576 | -8.646  | -11.998 | -11.984 | 15.335 | 0.0012 |
| C6A  | H6A2 | 435.24 | -1106.97 | 0.9899 | 1.46763 | -8.683  | -12.014 | -12.005 | 15.336 | 0.0007 |
| C9A  | H9A  | 455.3  | -1212.56 | 0.9503 | 1.56031 | -11.086 | -13.244 | -13.18  | 15.338 | 0.0049 |
| C9A  | C10A | 588.38 | -1259.93 | 1.3757 | 1.54202 | -3.054  | -7.281  | -7.072  | 11.3   | 0.0295 |
| C10A | H10A | 456.2  | -1217.11 | 0.9491 | 1.56421 | -11.188 | -13.33  | -13.192 | 15.334 | 0.0105 |
| C10A | C11A | 587.44 | -1257.24 | 1.3765 | 1.53989 | -3.024  | -7.284  | -7.048  | 11.308 | 0.0336 |



|      |      |       |          |        |         |         |         |         |       |        |
|------|------|-------|----------|--------|---------|---------|---------|---------|-------|--------|
| C11A | H11A | 455   | -1212.23 | 0.9501 | 1.56014 | -11.096 | -13.214 | -13.212 | 15.33 | 0.0002 |
| H6A  | H2A2 | 12.08 | -10.43   | 2.3798 | 0.06066 | 0.504   | -0.164  | -0.115  | 0.783 | 0.4205 |

**Table S3:** Topological properties of metal complex 2

| Atom1 | Atom2 | Gcp<br>kJ/mol/Bohr <sup>3</sup> | Vcp<br>kJ/mol/Bohr <sup>3</sup> | DIST12 | $\rho(r)$ | $\nabla^2\rho(r)$ | $\lambda_1$ | $\lambda_2$ | $\lambda_3$ | $\epsilon$ |
|-------|-------|---------------------------------|---------------------------------|--------|-----------|-------------------|-------------|-------------|-------------|------------|
| Co1   | N13   | 294.86                          | -334.23                         | 1.955  | 0.57544   | 9.38              | -2.711      | -2.71       | 14.801      | 0.0002     |
| Co1   | N15   | 291.35                          | -329.88                         | 1.9589 | 0.57064   | 9.282             | -2.675      | -2.675      | 14.633      | 0.0001     |
| Co1   | N17   | 293.22                          | -332.21                         | 1.9571 | 0.57322   | 9.334             | -2.691      | -2.69       | 14.715      | 0.0003     |
| Co1   | N19   | 288.76                          | -326.68                         | 1.9615 | 0.56708   | 9.21              | -2.652      | -2.652      | 14.513      | 0.0001     |
| S1    | C14   | 446.76                          | -934.66                         | 1.6281 | 1.28351   | -1.51             | -4.955      | -4.955      | 8.399       | 0          |
| S2    | C16   | 439.58                          | -913.18                         | 1.6377 | 1.26404   | -1.249            | -4.884      | -4.884      | 8.518       | 0          |
| S3    | C18   | 439.27                          | -912.19                         | 1.6382 | 1.26312   | -1.235            | -4.88       | -4.88       | 8.524       | 0          |
| S4    | C20   | 446.06                          | -932.63                         | 1.6289 | 1.28169   | -1.487            | -4.948      | -4.948      | 8.409       | 0          |
| N13   | C14   | 1475.16                         | -2664.55                        | 1.1567 | 2.33399   | 10.492            | -13.089     | -13.089     | 36.67       | 0          |
| N15   | C16   | 1420.03                         | -2601.39                        | 1.1641 | 2.30803   | 8.762             | -12.768     | -12.767     | 34.297      | 0.0001     |
| N17   | C18   | 1427.81                         | -2610.33                        | 1.1631 | 2.31172   | 9.006             | -12.811     | -12.81      | 34.626      | 0.0001     |
| N19   | C20   | 1391.08                         | -2568.82                        | 1.168  | 2.29475   | 7.833             | -12.602     | -12.602     | 33.037      | 0          |
| Co1A  | N13A  | 299.34                          | -339.84                         | 1.9507 | 0.58166   | 9.503             | -2.748      | -2.746      | 14.997      | 0.001      |
| Co1A  | N15A  | 289.42                          | -327.48                         | 1.9611 | 0.56796   | 9.229             | -2.657      | -2.656      | 14.541      | 0.0003     |
| Co1A  | N17A  | 305.03                          | -346.97                         | 1.9449 | 0.58947   | 9.659             | -2.8        | -2.799      | 15.258      | 0.0002     |
| Co1A  | N19A  | 295.83                          | -335.48                         | 1.9543 | 0.57686   | 9.406             | -2.715      | -2.714      | 14.835      | 0.0001     |
| S1A   | C14A  | 442.73                          | -922.51                         | 1.6335 | 1.2725    | -1.36             | -4.914      | -4.914      | 8.469       | 0          |
| S2A   | C16A  | 439.53                          | -912.79                         | 1.638  | 1.26364   | -1.239            | -4.881      | -4.88       | 8.523       | 0.0002     |
| S3A   | C18A  | 440.81                          | -916.19                         | 1.6367 | 1.26666   | -1.269            | -4.891      | -4.888      | 8.509       | 0.0007     |
| S4A   | C20A  | 438.99                          | -911                            | 1.639  | 1.26197   | -1.212            | -4.874      | -4.874      | 8.536       | 0.0002     |
| N13A  | C14A  | 1477.71                         | -2667.29                        | 1.1564 | 2.33505   | 10.579            | -13.102     | -13.102     | 36.784      | 0          |
| N15A  | C16A  | 1477.94                         | -2667.38                        | 1.1564 | 2.33504   | 10.592            | -13.104     | -13.103     | 36.798      | 0.0001     |
| N17A  | C18A  | 1587.21                         | -2792.11                        | 1.1423 | 2.38559   | 14.037            | -13.759     | -13.758     | 41.553      | 0.0001     |

|      |      |         |          |        |         |        |         |         |        |        |
|------|------|---------|----------|--------|---------|--------|---------|---------|--------|--------|
| N19A | C20A | 1620.69 | -2830.24 | 1.1381 | 2.40088 | 15.096 | -13.966 | -13.965 | 43.026 | 0      |
| N4   | C3   | 633.65  | -1199.84 | 1.4613 | 1.46135 | 2.477  | -7.29   | -7.211  | 16.978 | 0.0109 |
| N4   | C5   | 638.3   | -1211.7  | 1.4582 | 1.4708  | 2.383  | -7.332  | -7.253  | 16.968 | 0.0108 |
| N4   | C7   | 758.84  | -1613.54 | 1.3402 | 1.78643 | -3.519 | -9.178  | -8.886  | 14.545 | 0.0329 |
| N1   | H1A  | 563.88  | -1752.26 | 0.8965 | 1.98436 | 22.929 | -27.047 | -27.042 | 31.16  | 0.0002 |
| N1   | H1B  | 562.26  | -1689.7  | 0.9096 | 1.93393 | 20.751 | -25.635 | -25.606 | 30.49  | 0.0011 |
| N1   | C2   | 612.83  | -1138.84 | 1.4865 | 1.41053 | 3.187  | -6.861  | -6.853  | 16.901 | 0.0012 |
| N1   | C6   | 613.42  | -1141    | 1.485  | 1.41242 | 3.152  | -6.884  | -6.881  | 16.918 | 0.0004 |
| N8   | C7   | 760.13  | -1616.22 | 1.3399 | 1.7882  | -3.523 | -9.185  | -8.868  | 14.53  | 0.0358 |
| N8   | C9   | 792.26  | -1716.18 | 1.318  | 1.86007 | -4.834 | -9.491  | -9.196  | 13.853 | 0.032  |
| N12  | H12  | 559.75  | -1782.72 | 0.8877 | 2.01058 | -24.35 | -28.028 | -27.893 | 31.571 | 0.0048 |
| N12  | C7   | 750.47  | -1580.69 | 1.3507 | 1.76143 | -2.928 | -9.035  | -8.738  | 14.845 | 0.0339 |
| N12  | C11  | 756.74  | -1584.92 | 1.3542 | 1.76238 | -2.623 | -9.04   | -8.696  | 15.113 | 0.0395 |
| C2   | H2A  | 434.2   | -1105.92 | 0.9894 | 1.46711 | -8.721 | -12.029 | -12.022 | 15.331 | 0.0006 |
| C2   | H2B  | 433.81  | -1104.37 | 0.9899 | 1.46577 | -8.693 | -12.014 | -12.008 | 15.33  | 0.0005 |
| C2   | C3   | 465     | -898.85  | 1.5149 | 1.23423 | 1.144  | -5.427  | -5.426  | 11.997 | 0.0001 |
| C3   | H3A  | 434.26  | -1105.82 | 0.9895 | 1.46698 | -8.712 | -12.03  | -12.016 | 15.334 | 0.0012 |
| C3   | H3B  | 434.33  | -1104.24 | 0.9904 | 1.46538 | -8.649 | -11.99  | -11.986 | 15.327 | 0.0003 |
| C5   | H5A  | 435.15  | -1107.45 | 0.9893 | 1.46815 | -8.707 | -12.024 | -12.019 | 15.336 | 0.0005 |
| C5   | H5B  | 433.49  | -1102.12 | 0.9909 | 1.46369 | -8.633 | -11.99  | -11.977 | 15.334 | 0.0011 |
| C5   | C6   | 470.22  | -912.31  | 1.5093 | 1.24625 | 1.033  | -5.488  | -5.488  | 12.009 | 0      |
| C6   | H6A  | 433.89  | -1105.12 | 0.9896 | 1.46647 | -8.714 | -12.025 | -12.021 | 15.332 | 0.0003 |
| C6   | H6B  | 433.57  | -1103.33 | 0.9903 | 1.46485 | -8.672 | -12.003 | -11.997 | 15.328 | 0.0005 |
| C9   | H9   | 455.18  | -1211.74 | 0.9505 | 1.55959 | 11.065 | -13.276 | -13.121 | 15.331 | 0.0118 |
| C9   | C10  | 572.62  | -1211.44 | 1.3918 | 1.50278 | -2.431 | -7.096  | -6.836  | 11.502 | 0.038  |
| C10  | H10  | 456.17  | -1215.19 | 0.9501 | 1.5624  | 11.119 | -13.314 | -13.158 | 15.354 | 0.0119 |
| C10  | C11  | 621.18  | -1362.11 | 1.3439 | 1.6228  | -4.396 | -7.739  | -7.461  | 10.804 | 0.0373 |
| C11  | H11  | 455.25  | -1212.76 | 0.9502 | 1.56052 | -      | -13.272 | -13.16  | 15.335 | 0.0085 |

|      |      |        |          |        |         |        |         |         |         |        |        |
|------|------|--------|----------|--------|---------|--------|---------|---------|---------|--------|--------|
|      |      |        |          |        |         | 11.097 |         |         |         |        |        |
| N4A  | C3A  | 635.65 | -1204.91 | 1.4599 | 1.46539 | 2.437  | -7.312  | -7.224  | 16.973  | 0.0123 |        |
| N4A  | C5A  | 638.46 | -1211.82 | 1.4583 | 1.47084 | 2.39   | -7.32   | -7.263  | 16.973  | 0.0077 |        |
| N4A  | C7A  | 757.06 | -1608.02 | 1.3415 | 1.78241 | -3.447 | -9.087  | -8.94   | 14.58   | 0.0164 |        |
| N1A  | H1C  | 562.11 | -1714.67 | 0.9041 | 1.95449 | -      | 21.678  | -26.234 | -26.213 | 30.769 | 0.0008 |
| N1A  | H1D  | 566.78 | -1731.78 | 0.9019 | 1.96655 | -      | 21.963  | -26.437 | -26.434 | 30.908 | 0.0001 |
| N1A  | C2A  | 624.15 | -1169.97 | 1.4753 | 1.43626 | 2.876  | -7.033  | -7.032  | 16.94   | 0.0001 |        |
| N1A  | C6A  | 596.58 | -1096.52 | 1.5002 | 1.37547 | 3.548  | -6.659  | -6.648  | 16.855  | 0.0016 |        |
| N8A  | C7A  | 755.68 | -1602.44 | 1.343  | 1.77816 | -3.344 | -9.057  | -8.92   | 14.633  | 0.0153 |        |
| N8A  | C9A  | 785.61 | -1694.19 | 1.3232 | 1.84424 | -4.515 | -9.367  | -9.2    | 14.053  | 0.0182 |        |
| N12A | H12A | 557.28 | -1874.04 | 0.8701 | 2.08399 | -      | 27.884  | -30.204 | -30.156 | 32.476 | 0.0016 |
| N12A | C7A  | 744.96 | -1562.48 | 1.3552 | 1.74784 | -2.664 | -8.832  | -8.819  | 14.987  | 0.0016 |        |
| N12A | C11A | 765.2  | -1613.66 | 1.3473 | 1.78378 | -3.057 | -8.98   | -8.934  | 14.857  | 0.0051 |        |
| C2A  | H2C  | 433.72 | -1103.79 | 0.9901 | 1.46524 | -8.678 | -12.005 | -12.004 | 15.331  | 0.0001 |        |
| C2A  | H2D  | 433.42 | -1103    | 0.9903 | 1.4646  | -8.671 | -12.007 | -11.995 | 15.331  | 0.001  |        |
| C2A  | C3A  | 467.51 | -905.2   | 1.5123 | 1.23988 | 1.095  | -5.456  | -5.453  | 12.004  | 0.0006 |        |
| C3A  | H3C  | 433.38 | -1102.35 | 0.9906 | 1.46398 | -8.65  | -11.991 | -11.991 | 15.332  | 0      |        |
| C3A  | H3D  | 434.69 | -1105.47 | 0.99   | 1.46642 | -8.668 | -12     | -11.998 | 15.33   | 0.0002 |        |
| C5A  | H5C  | 434.61 | -1105.03 | 0.9903 | 1.46602 | -8.657 | -12.001 | -11.995 | 15.338  | 0.0005 |        |
| C5A  | H5D  | 434.69 | -1106.58 | 0.9895 | 1.46752 | -8.709 | -12.029 | -12.025 | 15.345  | 0.0004 |        |
| C5A  | C6A  | 478.81 | -935.13  | 1.4998 | 1.26659 | 0.826  | -5.6    | -5.596  | 12.021  | 0.0007 |        |
| C6A  | H6C  | 433.38 | -1102.15 | 0.9908 | 1.46378 | -8.642 | -11.99  | -11.978 | 15.326  | 0.001  |        |
| C6A  | H6D  | 433.9  | -1104.01 | 0.9902 | 1.46537 | -8.673 | -12.01  | -11.992 | 15.329  | 0.0015 |        |
| C9A  | H9A  | 455.25 | -1213.2  | 0.9498 | 1.56095 | -      | 11.114  | -13.248 | -13.195 | 15.329 | 0.0041 |
| C9A  | C10A | 577.64 | -1227.07 | 1.3865 | 1.51553 | -2.635 | -7.05   | -7.024  | 11.438  | 0.0037 |        |
| C10A | H10A | 456.03 | -1214.72 | 0.9502 | 1.56202 | -      | 11.113  | -13.3   | -13.162 | 15.35  | 0.0105 |
| C10A | C11A | 611.01 | -1330.15 | 1.3536 | 1.59778 | -3.97  | -7.556  | -7.386  | 10.972  | 0.023  |        |

|      |      |        |          |        |         |        |         |         |        |         |
|------|------|--------|----------|--------|---------|--------|---------|---------|--------|---------|
| C11A | H11A | 455.34 | -1213    | 0.9501 | 1.56072 | -11.1  | -13.262 | -13.171 | 15.334 | 0.0069  |
| O1   | H1O  | 316.1  | -2111.78 | 0.8298 | 2.35338 | 54.323 | -50.113 | -50.057 | 45.848 | 0.0011  |
| O1   | H1P  | 324.6  | -2103.99 | 0.8316 | 2.34467 | 53.412 | -49.568 | -49.53  | 45.685 | 0.0008  |
| O2   | H2O  | 392.4  | -2028.83 | 0.8473 | 2.26475 | 45.675 | -44.987 | -44.905 | 44.217 | 0.0018  |
| O2   | H2P  | 410.42 | -2004.92 | 0.8524 | 2.24025 | 43.473 | -43.617 | -43.611 | 43.755 | 0.0002  |
| S3   | H5A  | 11.12  | -9       | 3.0417 | 0.05233 | 0.486  | -0.123  | -0.079  | 0.688  | 0.5485  |
| S4   | N17A | 10.13  | -7.67    | 3.4695 | 0.04433 | 0.462  | -0.09   | -0.043  | 0.595  | 1.1052  |
| S4   | C7   | 9.38   | -6.88    | 3.6142 | 0.03995 | 0.436  | -0.055  | -0.036  | 0.527  | 0.5395  |
| C18  | N8   | 12.64  | -9.16    | 3.2365 | 0.04669 | 0.592  | -0.083  | -0.028  | 0.703  | 2.0193  |
| N17  | H9   | 11.63  | -8.68    | 2.9299 | 0.04698 | 0.535  | -0.073  | -0.036  | 0.644  | 1.0209  |
| C20  | N8   | 9.29   | -6.43    | 3.445  | 0.0353  | 0.446  | -0.064  | -0.004  | 0.514  | 13.3954 |
| S2A  | H1A  | 33.19  | -35.07   | 2.4452 | 0.14358 | 1.149  | -0.445  | -0.442  | 2.036  | 0.0069  |
| S3A  | H12  | 41.6   | -46.3    | 2.3493 | 0.17424 | 1.354  | -0.552  | -0.544  | 2.45   | 0.0154  |
| S3A  | O1   | 12.38  | -9.55    | 3.4734 | 0.05164 | 0.559  | -0.108  | -0.048  | 0.714  | 1.27    |
